# Supplementary material
Source: Springer Nature journal article supplement (https://www.springermedizin.de/resource/supplementary/13054_2011_9620_MOESM6_ESM.pdf/9706584)

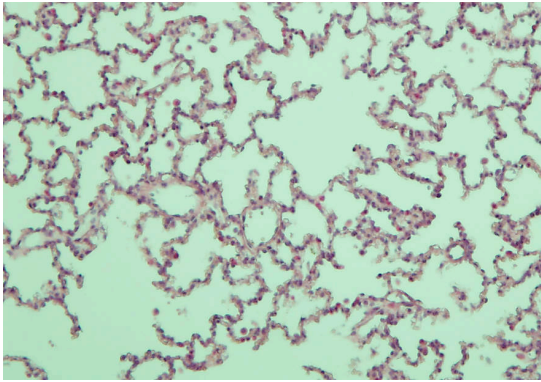

(A)

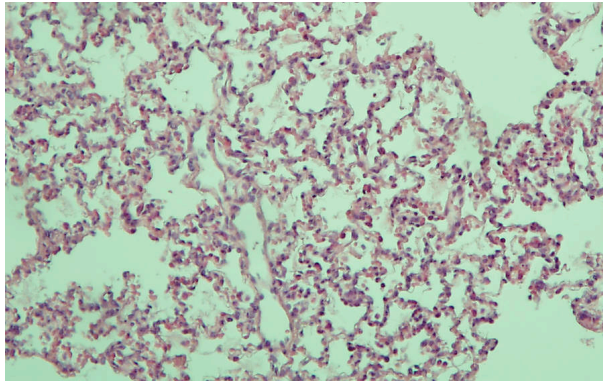

(B)

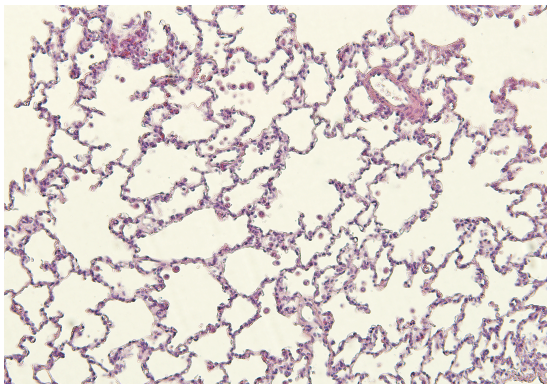

(C)

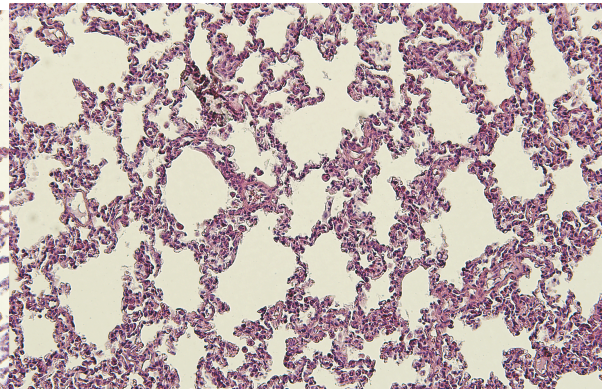

(D)

Supplement: MOESM6 [file 9706584]
